# Supplementary material for: Management factors affecting adrenal glucocorticoid activity of tourist camp elephants in Thailand and implications for elephant welfare
Source: PLoS One. 2019 Oct 1;14(10):e0221537. doi: 10.1371/journal.pone.0221537 (PMC6771993; doi:10.1371/journal.pone.0221537)
Supplement: S5 Table — (XLSX) [file pone.0221537.s005.xlsx]

## Sheet: Dataset
Camp	ElephantID	Time	MeanGC	BCS	FS	WS	Stereotype	Sex	Age	WorkType	WorkHour	WalkDistanceDay	WalkTimeDay	ChainHour	RestDay	RestNight	FreeForaging	Ankus
1	1	1	63.1233	3	1	0	N	M	25	rb	4.5	6000	60	19.5	Open	Open	N	N
1	2	1	76.1233	4	1	0	N	M	28	rb	4.5	6000	60	19.5	Open	Open	N	N
1	3	1	81.795	3	1	0	N	M	20	rb	4.5	6000	60	19.5	Open	Open	N	Y
1	4	1	44.8817	3	2	2	N	F	25	rb	4.5	6000	60	19.5	Open	Open	N	N
1	5	1	56.135	3	2	2	Y	F	18	rb	4.5	6000	60	19.5	Open	Tree	N	Y
1	6	1	52.28	4	2	0	N	F	18	rb	4.5	6000	60	19.5	Open	Tree	Y	Y
1	7	1	55.988	4	0	0	N	F	18	rb	4.5	6000	60	19.5	Open	Open	Y	N
1	8	1	42.436	4	1	2	N	F	45	rb	4.5	6000	60	19.5	Open	Open	N	Y
1	9	1	40.3767	4	2	0	N	F	22	rb	4.5	6000	60	19.5	Open	Open	N	N
1	10	1	56.085	NA	NA	NA	N	F	25	rb	4.5	6000	60	19.5	Open	Open	N	N
2	11	1	63.3567	4	1	0	N	M	21	rb	4.5	2000	80	19.5	Shed	Shed	N	Y
2	12	1	68.0783	4	1	0	N	M	30	rb	4.5	2000	80	19.5	Shed	Shed	N	Y
2	13	1	51.8783	4	1	0	N	M	16	rb	4.5	2000	80	19.5	Shed	Shed	N	Y
2	14	1	53.93	4	0	0	N	F	22	rb	4.5	2000	80	19.5	Shed	Shed	N	Y
2	15	1	51.1883	4	1	0	N	F	25	rb	4.5	2000	80	19.5	Shed	Shed	N	Y
2	16	1	75.0883	4	0	0	N	F	30	rb	4.5	2000	80	19.5	Shed	Shed	N	Y
2	17	1	52	4	2	0	N	F	30	rb	4.5	2000	80	19.5	Shed	Shed	N	Y
2	18	1	48.575	4	1	0	N	F	30	rb	4.5	2000	80	19.5	Shed	Shed	N	Y
2	19	1	NA	NA	NA	NA	N	F	30	rb	NA	NA	NA	NA	Shed	Shed	N	Y
2	20	1	NA	NA	NA	NA	N	F	34	rb	NA	NA	NA	NA	Shed	Shed	N	Y
3	21	1	46.4817	3	1	0	N	M	45	rs	7	6500	260	17	Shed	Shed	N	Y
3	22	1	56.525	4	2	2	N	M	38	rs	7	6500	260	17	Shed	Open	N	Y
3	23	1	51.98	3	1	1	N	M	40	rs	7	6500	260	17	Shed	Open	N	Y
3	24	1	78.8493	4	1	1	N	F	43	rs	7	6500	260	17	Shed	Open	N	Y
3	25	1	43.9423	4	2	0	Y	F	41	rs	7	6500	260	17	Shed	Shed	N	Y
3	26	1	60.3873	4	1	1	N	F	40	rs	7	6500	260	17	Shed	Shed	N	Y
3	27	1	59.4896	3	1	1	N	F	23	rs	7	6500	260	17	Shed	Shed	N	Y
4	28	1	35.1337	4	0	1	Y	M	20	rs	8	10000	450	16	Shed	Shed	N	Y
4	29	1	44.588	3	1	1	N	M	42	rs	8	10000	450	16	Shed	Shed	N	Y
4	30	1	44.06	3	2	0	N	M	28	sh	7	2000	160	17	Shed	Shed	N	Y
4	31	1	40.194	NA	NA	NA	N	F	45	rs	8	10000	450	16	Shed	Shed	N	Y
4	32	1	36.9083	4	1	0	N	F	40	rs	8	10000	450	16	Shed	Shed	N	Y
4	33	1	55.9	NA	NA	NA	Y	F	35	rs	8	10000	450	16	Shed	Shed	N	Y
4	34	1	40.5517	4	0	0	Y	F	42	rs	8	10000	450	16	Shed	Shed	N	Y
4	35	1	40.9823	3	2	0	Y	F	30	rs	8	10000	450	16	Shed	Shed	N	Y
4	36	1	40.7337	4	1	0	Y	F	20	rs	8	10000	450	16	Shed	Shed	N	Y
5	37	1	66.8633	5	3	0	N	F	33	ob	5.5	2000	30	0	Open	Enclosure	N	N
5	38	1	56.8887	5	0	0	N	F	41	nr	5	3000	300	0	Tree	Enclosure	Y	N
5	39	1	60.6484	3	1	0	N	F	39	nr	5	3000	300	0	Tree	Enclosure	Y	N
5	40	1	62.752	5	0	0	N	F	34	ob	5.5	2000	30	0	Open	Enclosure	N	N
5	41	1	55.3924	5	1	0	Y	F	50	ob	5.5	2000	30	0	Open	Enclosure	N	N
5	42	1	58.3257	5	0	0	N	F	30	nr	5	3000	300	0	Tree	Enclosure	Y	N
5	43	1	NA	NA	NA	NA	N	F	35	ob	NA	NA	NA	NA	Open	Enclosure	N	N
6	44	1	76.2757	3	0	1	Y	M	35	rs	7	8000	320	17	Shed	Open	N	Y
6	45	1	63.061	4	1	0	N	F	40	rs	7	8000	320	17	Shed	Forest	Y	Y
6	46	1	54.4923	4	2	1	N	F	30	rs	7	8000	320	17	Tree	Forest	Y	Y
6	47	1	41.8	4	2	1	N	F	40	rs	7	8000	320	17	Tree	Forest	Y	Y
7	48	1	48.4725	3	2	1	N	F	50	rs	5	3000	90	16	Shed	Shed	Y	Y
7	49	1	82.2167	4	1	2	N	F	32	rs	5	3000	90	16	Shed	Shed	Y	Y
8	50	1	70.3017	4	1	1	Y	M	20	rb	7.5	2000	80	16.5	Open	Open	Y	N
8	51	1	61.4367	5	2	0	N	F	35	nr	7.5	2000	80	16.5	Shed	Shed	Y	N
8	52	1	94.53	5	2	0	N	F	30	nr	7.5	2000	80	16.5	Shed	Shed	Y	N
8	53	1	72.63	5	0	0	Y	F	24	rb	7.5	2000	80	16.5	Shed	Shed	Y	N
8	54	1	58.1	4	0	0	Y	F	25	nr	7.5	2000	80	16.5	Shed	Shed	N	N
8	55	1	65.6525	5	0	0	Y	F	18	rb	7.5	2000	80	16.5	Open	Open	Y	N
9	56	1	39.33	3	2	1	N	M	55	nr	2	4000	60	22	Open	Forest	Y	N
9	57	1	50.5983	4	2	0	Y	F	29	nr	2	4000	60	22	Open	Forest	Y	N
9	58	1	39.2397	4	2	2	N	F	49	nr	2	4000	60	22	Open	Forest	Y	N
9	59	1	56.7288	5	2	0	N	F	49	nr	2	4000	60	22	Open	Forest	Y	N
9	60	1	51.6	NA	NA	NA	N	F	40	nr	NA	NA	NA	NA	Open	Forest	Y	N
10	61	1	30.13	4	2	0	N	F	32	rb	7	8000	240	17	Shed	Open	Y	Y
10	62	1	39.02	4	1	0	Y	F	28	rb	7	8000	240	17	Shed	Open	Y	Y
10	63	1	38.925	4	1	0	Y	F	43	rb	7	8000	240	17	Shed	Open	Y	Y
10	64	1	49.04	4	0	0	Y	F	25	rb	7	8000	240	17	Shed	Shed	Y	Y
11	65	1	64.67	4	0	0	Y	M	5	rb	6	3000	60	18	Tree	Open	N	N
11	66	1	54.064	2	1	0	N	F	60	rb	6	3000	60	18	Open	Open	N	N
11	67	1	50.1817	5	0	0	N	F	40	rb	6	3000	60	18	Open	Open	N	N
11	68	1	39.2783	3	1	1	N	F	40	rb	6	3000	60	18	Tree	Open	N	N
12	69	1	43.2567	3	0	0	Y	M	30	rs	1	30	10	23	Shed	Shed	N	Y
12	70	1	41.8183	3	1	1	Y	F	53	rb	1	10	25	23	Shed	Shed	N	Y
12	71	1	50.9283	4	0	1	Y	F	50	rb	1	10	25	23	Shed	Tree	N	Y
12	72	1	35.4675	3	0	0	N	M	5	sh	1	10	30	23	Shed	Shed	N	Y
13	73	1	45.84	4	0	0	N	F	30	rb	7	6000	120	17	Shed	Shed	Y	N
13	74	1	66.26	4	0	0	N	F	35	nr	7	6000	120	17	Shed	Shed	Y	N
13	75	1	38.858	5	2	0	N	F	40	rb	7	6000	120	17	Shed	Shed	Y	N
13	76	1	47.4733	4	0	0	N	F	38	rb	7	6000	120	17	Shed	Shed	Y	N
13	77	1	37.2083	4	0	0	N	F	32	rb	7	6000	120	17	Shed	Shed	Y	N
14	78	1	56.7733	3	2	0	N	F	30	nr	4.5	3000	120	0	Open	Enclosure	N	N
14	79	1	51.4083	4	0	1	N	F	30	nr	4.5	3000	120	0	Open	Enclosure	N	N
14	80	1	43.8717	5	2	0	N	F	30	nr	4.5	3000	120	0	Open	Enclosure	N	N
15	81	1	45.2117	4	1	0	N	F	65	nr	3.5	1000	180	0	Open	Enclosure	Y	N
15	82	1	47.0483	5	2	0	N	F	40	nr	3.5	1000	180	0	Open	Enclosure	Y	N
15	83	1	40.074	3	1	0	N	F	60	nr	3.5	1000	180	0	Open	Enclosure	Y	N
15	84	1	38.1783	5	1	0	N	F	60	nr	3.5	1000	180	0	Open	Enclosure	Y	N
1	1	2	78.0275	NA	NA	NA	N	M	25	rb	NA	12000	120	NA	Open	Open	N	N
1	2	2	70.5583	4	1	1	N	M	28	rb	7	12000	120	17	Open	Open	N	N
1	3	2	73.93	3	2	1	N	M	20	rb	7	12000	120	17	Open	Open	N	Y
1	4	2	92.4017	3	1	2	N	F	25	rb	7	12000	120	17	Open	Open	N	N
1	5	2	46.2217	3	2	0	Y	F	18	rb	7	12000	120	17	Open	Tree	N	Y
1	6	2	61.24	4	1	0	N	F	18	rb	7	12000	120	17	Open	Tree	Y	Y
1	7	2	67.2583	5	0	2	N	F	18	rb	7	12000	120	17	Open	Open	Y	N
1	8	2	61.28	4	0	2	N	F	45	rb	7	12000	120	17	Open	Open	N	Y
1	9	2	59.955	4	2	0	N	F	22	rb	7	12000	120	17	Open	Open	N	N
1	10	2	41.304	3	1	0	N	F	25	rb	7	12000	120	17	Open	Open	N	N
2	11	2	110.17	4	0	0	N	M	21	rb	1	1000	40	23	Shed	Shed	N	Y
2	12	2	89.72	4	1	0	N	M	30	rb	1	1000	40	23	Shed	Shed	N	Y
2	13	2	84.6667	4	1	1	N	M	16	rb	1	1000	40	23	Shed	Shed	N	Y
2	14	2	51.845	4	0	0	N	F	22	rb	1	1000	40	23	Shed	Shed	N	Y
2	15	2	80.1417	4	1	0	N	F	25	rb	1	1000	40	23	Shed	Shed	N	Y
2	16	2	49.7	4	0	0	N	F	30	rb	1	1000	40	23	Shed	Shed	N	Y
2	17	2	56.05	4	2	0	N	F	30	rb	1	1000	40	23	Shed	Shed	N	Y
2	18	2	67.7	5	1	0	N	F	30	rb	1	1000	40	23	Shed	Shed	N	Y
2	19	2	51.8875	4	1	1	N	F	30	rb	1	1000	40	23	Shed	Shed	N	Y
2	20	2	85.41	NA	NA	NA	N	F	34	rb	NA	NA	NA	NA	Shed	Shed	N	Y
3	21	2	39.7133	3	0	0	N	M	45	rs	6	2500	100	18	Shed	Shed	N	Y
3	22	2	46.9667	4	2	1	N	M	38	rs	6	2500	100	18	Shed	Open	N	Y
3	23	2	59.4433	2	2	1	N	M	40	rs	6	2500	100	18	Shed	Open	N	Y
3	24	2	51.345	4	1	0	N	F	43	rs	6	2500	100	18	Shed	Open	N	Y
3	25	2	49.8583	4	0	0	Y	F	41	rs	6	2500	100	18	Shed	Shed	N	Y
3	26	2	42.6167	4	1	0	N	F	40	rs	6	2500	100	18	Shed	Shed	N	Y
3	27	2	49.47	4	0	2	N	F	23	rs	6	2500	100	18	Shed	Shed	N	Y
4	28	2	33.265	4	1	1	Y	M	20	rs	6	3000	135	18	Shed	Shed	N	Y
4	29	2	31.7633	3	2	0	N	M	42	rs	6	3000	135	18	Shed	Shed	N	Y
4	30	2	33.12	3	2	0	N	M	28	sh	6	1500	120	18	Shed	Shed	N	Y
4	31	2	30.125	3	0	0	N	F	45	rs	6	3000	135	18	Shed	Shed	N	Y
4	32	2	36.3567	4	1	0	N	F	40	rs	6	3000	135	18	Shed	Shed	N	Y
4	33	2	35.7433	3	1	1	Y	F	35	rs	6	3000	135	18	Shed	Shed	N	Y
4	34	2	38.6283	4	1	0	Y	F	42	rs	6	3000	135	18	Shed	Shed	N	Y
4	35	2	46.9467	3	1	0	Y	F	30	rs	6	3000	135	18	Shed	Shed	N	Y
4	36	2	43.695	4	1	0	Y	F	20	rs	6	3000	135	18	Shed	Shed	N	Y
5	37	2	42.9667	5	0	0	N	F	33	ob	5.5	2000	30	0	Open	Enclosure	N	N
5	38	2	47.58	5	0	0	N	F	41	nr	5	3000	300	0	Tree	Enclosure	Y	N
5	39	2	56.162	3	1	0	N	F	39	nr	5	3000	300	0	Tree	Enclosure	Y	N
5	40	2	49.42	5	0	0	N	F	34	ob	5.5	2000	30	0	Open	Enclosure	N	N
5	41	2	50.942	5	1	0	Y	F	50	ob	5.5	2000	30	0	Open	Enclosure	N	N
5	42	2	54.294	5	0	0	N	F	30	nr	5	3000	300	0	Tree	Enclosure	Y	N
5	43	2	44.245	5	2	0	N	F	35	ob	5.5	2000	30	0	Open	Enclosure	N	N
6	44	2	57.2783	3	0	0	Y	M	35	rs	7	4000	160	17	Shed	Open	N	Y
6	45	2	43.995	4	2	0	N	F	40	rs	7	4000	160	17	Shed	Forest	Y	Y
6	46	2	37.4833	3	1	1	N	F	30	rs	7	4000	160	17	Tree	Forest	Y	Y
6	47	2	30.46	4	2	1	N	F	40	rs	7	4000	160	17	Tree	Forest	Y	Y
7	48	2	38.5675	3	3	0	N	F	50	rs	4.5	3000	90	16.5	Shed	Shed	Y	Y
7	49	2	74.2233	4	0	1	N	F	32	rs	4.5	3000	90	16.5	Shed	Shed	Y	Y
8	50	2	43.9	4	1	0	Y	M	20	rb	8	2000	80	16	Open	Open	Y	N
8	51	2	70.63	5	2	1	N	F	35	nr	8	2000	80	16	Shed	Shed	Y	N
8	52	2	74.128	5	1	0	N	F	30	nr	8	2000	80	16	Shed	Shed	Y	N
8	53	2	68.3125	4	1	2	Y	F	24	rb	8	2000	80	16	Shed	Shed	Y	N
8	54	2	46.348	4	1	0	Y	F	25	nr	8	2000	80	16	Shed	Shed	N	N
8	55	2	52.1	5	0	0	Y	F	18	rb	8	2000	80	16	Open	Open	Y	N
9	56	2	50.056	3	1	0	N	M	55	nr	2	4000	60	22	Open	Forest	Y	N
9	57	2	40.845	4	0	0	Y	F	29	nr	2	4000	60	22	Open	Forest	Y	N
9	58	2	44.8383	4	0	0	N	F	49	nr	2	4000	60	22	Open	Forest	Y	N
9	59	2	42	5	2	0	N	F	49	nr	2	4000	60	22	Open	Forest	Y	N
9	60	2	44.2667	5	0	0	N	F	40	nr	2	4000	60	22	Open	Forest	Y	N
10	61	2	54.1383	4	2	0	N	F	32	rb	9	12000	360	15	Shed	Open	Y	Y
10	62	2	42.9468	4	0	0	Y	F	28	rb	9	12000	360	15	Shed	Open	Y	Y
10	63	2	66.3333	4	0	0	Y	F	43	rb	9	12000	360	15	Shed	Open	Y	Y
10	64	2	51.642	4	0	0	Y	F	25	rb	9	12000	360	15	Shed	Shed	Y	Y
11	65	2	72.9367	NA	NA	NA	Y	M	5	rb	NA	NA	NA	NA	Tree	Open	N	N
11	66	2	66.855	2	0	0	N	F	60	rb	7	1000	20	17	Open	Open	N	N
11	67	2	56.84	5	0	0	N	F	40	rb	7	1000	20	17	Open	Open	N	N
11	68	2	51.845	4	1	0	N	F	40	rb	7	1000	20	17	Tree	Open	N	N
12	69	2	98.8333	3	0	0	Y	M	30	rs	3	30	10	21	Shed	Shed	N	Y
12	70	2	47.9733	3	1	1	Y	F	53	rb	3	10	25	21	Shed	Shed	N	Y
12	71	2	48.7033	4	0	0	Y	F	50	rb	3	10	25	21	Shed	Tree	N	Y
12	72	2	62.9933	3	0	1	N	M	5	sh	3	10	30	21	Shed	Shed	N	Y
13	73	2	48.2317	4	0	0	N	F	30	rb	6.5	6000	120	17.5	Shed	Shed	Y	N
13	74	2	68.874	4	0	0	N	F	35	nr	6.5	6000	120	17.5	Shed	Shed	Y	N
13	75	2	51.2017	4	1	0	N	F	40	rb	6.5	6000	120	17.5	Shed	Shed	Y	N
13	76	2	43.6083	3	3	1	N	F	38	rb	6.5	6000	120	17.5	Shed	Shed	Y	N
13	77	2	32.815	4	0	0	N	F	32	rb	6.5	6000	120	17.5	Shed	Shed	Y	N
14	78	2	43.765	3	2	0	N	F	30	nr	4.5	3000	120	0	Open	Enclosure	N	N
14	79	2	40.4733	4	2	0	N	F	30	nr	4.5	3000	120	0	Open	Enclosure	N	N
14	80	2	35.38	5	3	0	N	F	30	nr	4.5	3000	120	0	Open	Enclosure	N	N
15	81	2	45.7167	4	1	0	N	F	65	nr	3.5	1000	180	0	Open	Enclosure	Y	N
15	82	2	56.005	5	0	0	N	F	40	nr	3.5	1000	180	0	Open	Enclosure	Y	N
15	83	2	30.704	3	1	0	N	F	60	nr	3.5	1000	180	0	Open	Enclosure	Y	N
15	84	2	49.8533	5	0	1	N	F	60	nr	3.5	1000	180	0	Open	Enclosure	Y	N
1	1	3	57.675	3	1	0	N	M	25	rb	8.5	12000	120	15.5	Open	Open	N	N
1	2	3	70.38	4	2	0	N	M	28	rb	8.5	12000	120	15.5	Open	Open	N	N
1	3	3	62.975	4	1	1	N	M	20	rb	8.5	12000	120	15.5	Open	Open	N	Y
1	4	3	35.795	3	1	0	N	F	25	rb	8.5	12000	120	15.5	Open	Open	N	N
1	5	3	32.75	3	2	0	Y	F	18	rb	8.5	12000	120	15.5	Open	Tree	N	Y
1	6	3	52.67	4	1	0	N	F	18	rb	8.5	12000	120	15.5	Open	Tree	Y	Y
1	7	3	61.545	4	0	0	N	F	18	rb	8.5	12000	120	15.5	Open	Open	Y	N
1	8	3	54.225	5	2	2	N	F	45	rb	8.5	12000	120	15.5	Open	Open	N	Y
1	9	3	36.52	3	2	0	N	F	22	rb	8.5	12000	120	15.5	Open	Open	N	N
1	10	3	49	4	2	0	N	F	25	rb	8.5	12000	120	15.5	Open	Open	N	N
2	11	3	103.098	4	0	0	N	M	21	rb	4	2000	80	20	Shed	Shed	N	Y
2	12	3	50.945	4	1	0	N	M	30	rb	4	2000	80	20	Shed	Shed	N	Y
2	13	3	65.495	4	1	0	N	M	16	rb	4	2000	80	20	Shed	Shed	N	Y
2	14	3	46.585	4	1	0	N	F	22	rb	4	2000	80	20	Shed	Shed	N	Y
2	15	3	61.4833	4	1	0	N	F	25	rb	4	2000	80	20	Shed	Shed	N	Y
2	16	3	51.4883	4	0	0	N	F	30	rb	4	2000	80	20	Shed	Shed	N	Y
2	17	3	42.3133	4	1	0	N	F	30	rb	4	2000	80	20	Shed	Shed	N	Y
2	18	3	52.97	5	1	0	N	F	30	rb	4	2000	80	20	Shed	Shed	N	Y
2	19	3	53.8667	4	1	0	N	F	30	rb	4	2000	80	20	Shed	Shed	N	Y
2	20	3	65.4033	5	2	0	N	F	34	rb	4	2000	80	20	Shed	Shed	N	Y
3	21	3	36.64	2	1	0	N	M	45	rs	7	3500	140	17	Shed	Shed	N	Y
3	22	3	52.3483	4	1	0	N	M	38	rs	7	3500	140	17	Shed	Open	N	Y
3	23	3	43.315	3	2	1	N	M	40	rs	7	3500	140	17	Shed	Open	N	Y
3	24	3	32.1967	5	0	0	N	F	43	rs	7	3500	140	17	Shed	Open	N	Y
3	25	3	28.0467	4	1	0	Y	F	41	rs	7	3500	140	17	Shed	Shed	N	Y
3	26	3	30.1683	4	1	0	N	F	40	rs	7	3500	140	17	Shed	Shed	N	Y
3	27	3	41.255	4	1	0	N	F	23	rs	7	3500	140	17	Shed	Shed	N	Y
4	28	3	53.3667	4	0	0	Y	M	20	rs	6.5	3000	135	17.5	Shed	Shed	N	Y
4	29	3	26.09	2	1	1	N	M	42	rs	6.5	3000	135	17.5	Shed	Shed	N	Y
4	30	3	42.48	3	2	0	N	M	28	sh	6.5	2500	200	17.5	Shed	Shed	N	Y
4	31	3	29.0483	3	0	0	N	F	45	rs	6.5	3000	135	17.5	Shed	Shed	N	Y
4	32	3	40.8067	4	1	0	N	F	40	rs	6.5	3000	135	17.5	Shed	Shed	N	Y
4	33	3	33.9767	3	1	0	Y	F	35	rs	6.5	3000	135	17.5	Shed	Shed	N	Y
4	34	3	39.5767	4	0	0	Y	F	42	rs	6.5	3000	135	17.5	Shed	Shed	N	Y
4	35	3	32.5583	2	0	0	Y	F	30	rs	6.5	3000	135	17.5	Shed	Shed	N	Y
4	36	3	34.8517	4	2	0	Y	F	20	rs	6.5	3000	135	17.5	Shed	Shed	N	Y
5	37	3	53.0367	5	1	0	N	F	33	ob	5.5	2000	30	0	Open	Enclosure	N	N
5	38	3	56.716	5	0	2	N	F	41	nr	5	3000	300	0	Tree	Enclosure	Y	N
5	39	3	50.93	3	1	0	N	F	39	nr	5	3000	300	0	Tree	Enclosure	Y	N
5	40	3	47.0567	5	0	0	N	F	34	ob	5.5	2000	30	0	Open	Enclosure	N	N
5	41	3	40.3517	5	1	0	Y	F	50	ob	5.5	2000	30	0	Open	Enclosure	N	N
5	42	3	64.8633	5	0	0	N	F	30	nr	5	3000	300	0	Tree	Enclosure	Y	N
5	43	3	52.2467	5	2	0	N	F	35	ob	5.5	2000	30	0	Open	Enclosure	N	N
6	44	3	50.48	3	1	0	Y	M	35	rs	6.5	6500	260	17.5	Shed	Open	N	Y
6	45	3	33.8533	4	0	0	N	F	40	rs	6.5	6500	260	17.5	Shed	Forest	Y	Y
6	46	3	25.614	3	0	0	N	F	30	rs	6.5	6500	260	17.5	Tree	Forest	Y	Y
6	47	3	43.748	5	2	1	N	F	40	rs	6.5	6500	260	17.5	Tree	Forest	Y	Y
7	48	3	39.8917	3	3	0	N	F	50	rs	5	3000	90	16	Shed	Shed	Y	Y
7	49	3	57.63	4	0	1	N	F	32	rs	5	3000	90	16	Shed	Shed	Y	Y
8	50	3	39.82	4	1	1	Y	M	20	rb	6	2000	80	18	Open	Open	Y	N
8	51	3	35.72	5	2	1	N	F	35	nr	6	2000	80	18	Shed	Shed	Y	N
8	52	3	47.31	5	1	0	N	F	30	nr	6	2000	80	18	Shed	Shed	Y	N
8	53	3	47.54	4	0	0	Y	F	24	rb	6	2000	80	18	Shed	Shed	Y	N
8	54	3	NA	4	1	0	Y	F	25	nr	6	2000	80	18	Shed	Shed	N	N
8	55	3	42.155	5	1	0	Y	F	18	rb	6	2000	80	18	Open	Open	Y	N
9	56	3	43.4133	2	0	0	N	M	55	nr	5	4000	60	19	Open	Forest	Y	N
9	57	3	32.9567	4	1	0	Y	F	29	nr	5	4000	60	19	Open	Forest	Y	N
9	58	3	31.3433	4	1	0	N	F	49	nr	5	4000	60	19	Open	Forest	Y	N
9	59	3	31.1317	5	2	0	N	F	49	nr	5	4000	60	19	Open	Forest	Y	N
9	60	3	32.806	5	0	0	N	F	40	nr	5	4000	60	19	Open	Forest	Y	N
10	61	3	39.408	4	1	0	N	F	32	rb	9	8000	240	15	Shed	Open	Y	Y
10	62	3	28.124	4	0	0	Y	F	28	rb	9	8000	240	15	Shed	Open	Y	Y
10	63	3	32.164	4	0	0	Y	F	43	rb	9	8000	240	15	Shed	Open	Y	Y
10	64	3	35.895	4	1	0	Y	F	25	rb	9	8000	240	15	Shed	Shed	Y	Y
11	65	3	57.2	4	0	0	Y	M	5	rb	4.5	3000	60	19.5	Tree	Open	N	N
11	66	3	60.2267	2	0	0	N	F	60	rb	0	0	0	24	Open	Open	N	N
11	67	3	46.3667	4	0	0	N	F	40	rb	4.5	3000	60	19.5	Open	Open	N	N
11	68	3	64.9483	3	2	0	N	F	40	rb	4.5	3000	60	19.5	Tree	Open	N	N
12	69	3	65.1617	3	0	0	Y	M	30	rs	3	30	10	21	Shed	Shed	N	Y
12	70	3	47.422	3	1	0	Y	F	53	rb	3	10	25	21	Shed	Shed	N	Y
12	71	3	43.5717	4	0	2	Y	F	50	rb	3	10	25	21	Shed	Tree	N	Y
12	72	3	70.58	3	0	0	N	M	5	sh	3	10	30	21	Shed	Shed	N	Y
13	73	3	57.3783	4	0	0	N	F	30	rb	6	6000	120	18	Shed	Shed	Y	N
13	74	3	53.1183	4	0	0	N	F	35	nr	6	6000	120	18	Shed	Shed	Y	N
13	75	3	52.49	5	0	0	N	F	40	rb	6	6000	120	18	Shed	Shed	Y	N
13	76	3	52.8267	3	2	1	N	F	38	rb	6	6000	120	18	Shed	Shed	Y	N
13	77	3	41.7083	4	0	0	N	F	32	rb	6	6000	120	18	Shed	Shed	Y	N
14	78	3	45.602	3	1	0	N	F	30	nr	4.5	3000	120	0	Open	Enclosure	N	N
14	79	3	44.13	4	0	0	N	F	30	nr	4.5	3000	120	0	Open	Enclosure	N	N
14	80	3	30.804	5	1	0	N	F	30	nr	4.5	3000	120	0	Open	Enclosure	N	N
15	81	3	31.1	3	1	0	N	F	65	nr	3.5	1000	180	0	Open	Enclosure	Y	N
15	82	3	50.212	5	0	0	N	F	40	nr	3.5	1000	180	0	Open	Enclosure	Y	N
15	83	3	43.3383	3	2	0	N	F	60	nr	3.5	1000	180	0	Open	Enclosure	Y	N
15	84	3	38.9333	5	0	0	N	F	60	nr	3.5	1000	180	0	Open	Enclosure	Y	N
1	1	4	40.495	3	1	0	N	M	25	rb	7	12000	120	17	Open	Open	N	N
1	2	4	61.83	3	2	0	N	M	28	rb	7	12000	120	17	Open	Open	N	N
1	3	4	47.415	3	0	0	N	M	20	rb	7	12000	120	17	Open	Open	N	Y
1	4	4	34.87	3	2	0	N	F	25	rb	7	12000	120	17	Open	Open	N	N
1	5	4	15.005	3	0	1	Y	F	18	rb	7	12000	120	17	Open	Tree	N	Y
1	6	4	18.875	3	1	0	N	F	18	rb	7	12000	120	17	Open	Tree	Y	Y
1	7	4	23.185	4	1	0	N	F	18	rb	7	12000	120	17	Open	Open	Y	N
1	8	4	16.405	4	0	0	N	F	45	rb	7	12000	120	17	Open	Open	N	Y
1	9	4	33.81	2	1	0	N	F	22	rb	7	12000	120	17	Open	Open	N	N
1	10	4	24.545	2	2	0	N	F	25	rb	7	12000	120	17	Open	Open	N	N
2	11	4	119.212	4	0	0	N	M	21	rb	4.5	2000	80	19.5	Shed	Shed	N	Y
2	12	4	80.4433	4	1	0	N	M	30	rb	4.5	2000	80	19.5	Shed	Shed	N	Y
2	13	4	77.5983	4	1	0	N	M	16	rb	4.5	2000	80	19.5	Shed	Shed	N	Y
2	14	4	78.095	5	1	0	N	F	22	rb	4.5	2000	80	19.5	Shed	Shed	N	Y
2	15	4	NA	NA	NA	NA	N	F	25	rb	NA	NA	NA	NA	Shed	Shed	N	Y
2	16	4	114.13	4	0	1	N	F	30	rb	4.5	2000	80	19.5	Shed	Shed	N	Y
2	17	4	64.0767	4	1	1	N	F	30	rb	4.5	2000	80	19.5	Shed	Shed	N	Y
2	18	4	94.7467	5	1	0	N	F	30	rb	4.5	2000	80	19.5	Shed	Shed	N	Y
2	19	4	68.348	4	1	0	N	F	30	rb	4.5	2000	80	19.5	Shed	Shed	N	Y
2	20	4	74.74	5	1	1	N	F	34	rb	4.5	2000	80	19.5	Shed	Shed	N	Y
3	21	4	56.935	2	1	0	N	M	45	rs	7	3500	140	17	Shed	Shed	N	Y
3	22	4	100.27	3	2	0	N	M	38	rs	7	3500	140	17	Shed	Open	N	Y
3	23	4	58.6167	3	1	1	N	M	40	rs	7	3500	140	17	Shed	Open	N	Y
3	24	4	49.345	5	0	1	N	F	43	rs	7	3500	140	17	Shed	Open	N	Y
3	25	4	49.3333	4	1	1	Y	F	41	rs	7	3500	140	17	Shed	Shed	N	Y
3	26	4	50.1917	4	1	0	N	F	40	rs	7	3500	140	17	Shed	Shed	N	Y
3	27	4	67.9217	3	1	2	N	F	23	rs	7	3500	140	17	Shed	Shed	N	Y
4	28	4	35.025	4	0	0	Y	M	20	rs	7	5000	225	17	Shed	Shed	N	Y
4	29	4	39.585	2	0	0	N	M	42	rs	7	5000	225	17	Shed	Shed	N	Y
4	30	4	49.39	3	1	0	N	M	28	sh	4	1500	120	20	Shed	Shed	N	Y
4	31	4	41.065	4	0	0	N	F	45	rs	7	5000	225	17	Shed	Shed	N	Y
4	32	4	43.7067	5	1	0	N	F	40	rs	7	5000	225	17	Shed	Shed	N	Y
4	33	4	43.2317	3	1	2	Y	F	35	rs	7	5000	225	17	Shed	Shed	N	Y
4	34	4	41.5733	4	0	0	Y	F	42	rs	7	5000	225	17	Shed	Shed	N	Y
4	35	4	36.5683	3	0	0	Y	F	30	rs	7	5000	225	17	Shed	Shed	N	Y
4	36	4	40.3767	4	0	0	Y	F	20	rs	7	5000	225	17	Shed	Shed	N	Y
5	37	4	77.582	5	0	0	N	F	33	ob	5.5	2000	30	0	Open	Enclosure	N	N
5	38	4	57.918	5	0	0	N	F	41	nr	5	3000	300	0	Tree	Enclosure	Y	N
5	39	4	75.672	3	1	0	N	F	39	nr	5	3000	300	0	Tree	Enclosure	Y	N
5	40	4	53.404	5	0	0	N	F	34	ob	5.5	2000	30	0	Open	Enclosure	N	N
5	41	4	62.31	5	1	0	Y	F	50	ob	5.5	2000	30	0	Open	Enclosure	N	N
5	42	4	103.428	5	0	0	N	F	30	nr	5	3000	300	0	Tree	Enclosure	Y	N
5	43	4	70.516	5	1	0	N	F	35	ob	5.5	2000	30	0	Open	Enclosure	N	N
6	44	4	44.59	4	0	0	Y	M	35	rs	6	3000	120	18	Shed	Open	N	Y
6	45	4	38.246	4	1	1	N	F	40	rs	6	3000	120	18	Shed	Forest	Y	Y
6	46	4	32.95	3	1	0	N	F	30	rs	6	3000	120	18	Tree	Forest	Y	Y
6	47	4	30.0925	5	1	0	N	F	40	rs	6	3000	120	18	Tree	Forest	Y	Y
7	48	4	88.1625	3	1	0	N	F	50	rs	2.5	3000	90	21.5	Shed	Shed	Y	Y
7	49	4	100.01	4	1	0	N	F	32	rs	2.5	3000	90	21.5	Shed	Shed	Y	Y
8	50	4	53.2633	4	1	0	Y	M	20	rb	7.5	2000	80	16.5	Open	Open	Y	N
8	51	4	58.1467	5	2	0	N	F	35	nr	7.5	2000	80	16.5	Shed	Shed	Y	N
8	52	4	49.0333	5	0	0	N	F	30	nr	7.5	2000	80	16.5	Shed	Shed	Y	N
8	53	4	32.4067	5	0	0	Y	F	24	rb	7.5	2000	80	16.5	Shed	Shed	Y	N
8	54	4	41.915	4	2	0	Y	F	25	nr	7.5	2000	80	16.5	Shed	Shed	N	N
8	55	4	44.0383	5	0	0	Y	F	18	rb	7.5	2000	80	16.5	Open	Open	Y	N
9	56	4	30.92	NA	NA	NA	N	M	55	nr	NA	NA	NA	NA	Open	Forest	Y	N
9	57	4	36.1417	5	1	0	Y	F	29	nr	5	4000	60	19	Open	Forest	Y	N
9	58	4	40.3033	5	0	0	N	F	49	nr	5	4000	60	19	Open	Forest	Y	N
9	59	4	42.855	4	1	0	N	F	49	nr	5	4000	60	19	Open	Forest	Y	N
9	60	4	62.03	4	0	0	N	F	40	nr	5	4000	60	19	Open	Forest	Y	N
10	61	4	49.508	5	1	0	N	F	32	rb	3	4000	120	21	Shed	Open	Y	Y
10	62	4	47.3867	4	0	0	Y	F	28	rb	3	4000	120	21	Shed	Open	Y	Y
10	63	4	68.5967	4	1	0	Y	F	43	rb	3	4000	120	21	Shed	Open	Y	Y
10	64	4	38.3067	4	0	0	Y	F	25	rb	3	4000	120	21	Shed	Shed	Y	Y
11	65	4	68.6975	4	0	0	Y	M	5	rb	7	3000	60	17	Tree	Open	N	N
11	66	4	86.98	2	0	2	N	F	60	rb	7	3000	60	17	Open	Open	N	N
11	67	4	60.3833	5	1	0	N	F	40	rb	7	3000	60	17	Open	Open	N	N
11	68	4	73.756	4	1	0	N	F	40	rb	7	3000	60	17	Tree	Open	N	N
12	69	4	105.097	3	3	0	Y	M	30	rs	2	30	10	22	Shed	Shed	N	Y
12	70	4	31.74	3	1	0	Y	F	53	rb	2	10	25	22	Shed	Shed	N	Y
12	71	4	53.6283	4	0	0	Y	F	50	rb	2	10	25	22	Shed	Tree	N	Y
12	72	4	64.4233	4	0	0	N	M	5	sh	2	10	30	22	Shed	Shed	N	Y
13	73	4	75.0233	4	0	0	N	F	30	rb	6	6000	120	18	Shed	Shed	Y	N
13	74	4	117.397	5	0	0	N	F	35	nr	6	6000	120	18	Shed	Shed	Y	N
13	75	4	92.3733	5	0	0	N	F	40	rb	6	6000	120	18	Shed	Shed	Y	N
13	76	4	68.515	3	1	0	N	F	38	rb	6	6000	120	18	Shed	Shed	Y	N
13	77	4	64.6917	4	0	0	N	F	32	rb	6	6000	120	18	Shed	Shed	Y	N
14	78	4	66.6333	3	1	0	N	F	30	nr	4.5	3000	20	0	Open	Enclosure	N	N
14	79	4	79.4483	4	0	0	N	F	30	nr	4.5	3000	20	0	Open	Enclosure	N	N
14	80	4	60.295	5	1	0	N	F	30	nr	4.5	3000	20	0	Open	Enclosure	N	N
15	81	4	79.3	3	1	0	N	F	65	nr	3.5	1000	180	0	Open	Enclosure	Y	N
15	82	4	71.6233	5	0	0	N	F	40	nr	3.5	1000	180	0	Open	Enclosure	Y	N
15	83	4	47.4467	3	1	0	N	F	60	nr	3.5	1000	180	0	Open	Enclosure	Y	N
15	84	4	60.0067	5	0	0	N	F	60	nr	3.5	1000	180	0	Open	Enclosure	Y	N
